# Supplementary material
Source: Springer Nature journal article supplement (https://www.springermedizin.de/resource/supplementary/12891_2008_662_MOESM1_ESM.pdf/9506498)

Number of persons

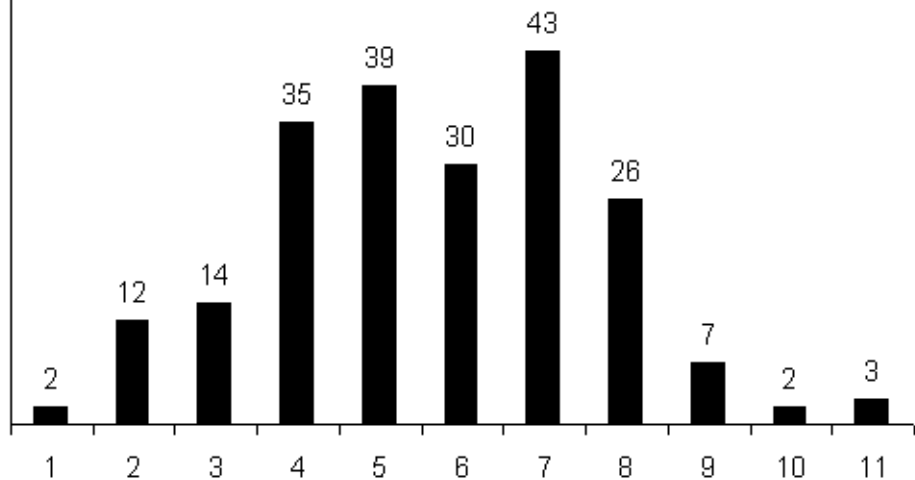

Number of different sick-leave diagnoses a person had

Supplement: MOESM1 [file 9506498]
